# Supplementary material for: How Humans Differ from Other Animals in Their Levels of Morphological Variation
Source: PLoS One. 2009 Sep 1;4(9):e6876. doi: 10.1371/journal.pone.0006876 (PMC2730817; doi:10.1371/journal.pone.0006876)
Supplement: Table S3 — Percentiles for mean within- and among-population male and female human height and mass in relation to species-mean amphibian, invertebrate, mammal, and reptile length and mass distributions. Percentiles are not shown for taxa distributions with n<5 animal species. (0.03 MB DOC) [file pone.0006876.s003.doc]

**Table S3. Percentiles for mean within- and among-population male and female human height and mass in relation to species-mean amphibian, invertebrate, mammal, and reptile length and mass distributions**. Percentiles are not shown for taxa distributions with n < 5 animal species.

|  |  | Amphibian | Invert | Mammal | Reptile |
| --- | --- | --- | --- | --- | --- |
| Within populations | Male height | 0th | 0th | 18th | 0th |
|  | Female height | 0th | 0th | 5.5th | 5.7th |
|  | Male mass | - | - | 59th | 0th |
|  | Female mass | - | 45th | 66th | 0th |
| Among populations | Male height | 19th | 39th | 61st | 21st |
|  | Female height | 9.5th | 47th | 57th | 41st |
|  | Male mass | - | - | 54th | 31st |
|  | Female mass | - | - | 79th | 65th |
